# Supplementary material for: Lysine-Specific Demethylase 1 (LSD1) Modulates Hypoxia and Antitumor Immunity Pathways in Triple Negative Breast Cancer
Source: Research Square preprint supplement (doi:10.21203/rs.3.rs-5583081/v1), 2024-12-30
Supplement: Supplementary file 1 [file 564157a943f57351e393e166.docx]

**Lysine-Specific Demethylase 1 (LSD1) Modulates Hypoxia and Antitumor Immunity Pathways in Triple Negative Breast Cancer**

Dong Yeul Lee, Jing Han Hong, Peiyong Guan, Bernett Lee, Stefano Perna, Jianzhou Cui, Chenshi Lin, Jin Miao Chen, Johnathan Xiande Lim, Joe Poh Sheng Yeong, Puay Hoon Tan, Bin Tean Teh, Jabed Iqbal

**SUPPLEMENTARY MATERIAL**

**Supplementary figures: Figures S1-S5**

**Supplementary tables: Tables S1-S7**

**SUPPLEMENTARY FIGURES**

**Fig. S1. Differential expressed genes in LSD1-expressing TNBCs and survival outcomes of prognostic gene candidates linked to LSD1 levels within SGH local cohort.** **(A)** Volcano plot on significant differential expressed NanoString gene panels between LSD1 status groups within SGH cohort **(B)** Kaplan-Meier analysis on survival outcomes in prognostic gene candidates (*VEGFA/HIF1A/HK2*)-expressing TNBCs within SGH local cohort.

**Fig. S2. Increased *LSD1* gene expression association with poorer TNBC survival outcomes and identification of differentially expressed genes within LSD1 status TNBCs. (A)** Kaplan-Meier analysis on survival outcomes in *LSD1*-expressing TNBCs. **(B)** Volcano plot on significant differential expressed genes between LSD1 status groups. **(C)** Venn diagram on overlapping *LSD1*-expressing DEGs within public TNBC cohorts.

**Fig. S3.** **Identification and survival outcomes of prognostic cell-cycle associated hub genes within *LSD1*-expressing TNBCs. (A)** Protein-protein interaction network of top 15 cell cycle associated hub genes. **(B)** Kaplan-Meier analysis on survival outcomes for prognostic cell cycle associated hub genes (*PLK1*-expressing TNBCs). **(C)** Kaplan-Meier analysis on survival outcomes for prognostic cell cycle associated hub genes (*CCNE1*-expressing TNBCs). **(D)** Kaplan-Meier analysis on survival outcomes for prognostic cell cycle associated hub genes (*E2F2*-expressing TNBCs). **(E)** Kaplan-Meier analysis on survival outcomes for prognostic cell cycle associated hub genes (*MYC*-expressing TNBCs).

**Fig. S4. Representative images of TMA digital spatial profiling (DSP) within lymphocyte-labelled regions of LSD1+ tumor samples. (A)** CD8 immunofluorescence labeling of TMA TNBC tissues with LSD1 status. CD8 T cells (red), Pancytokeratin tumors (green), SYTO 13 nuclei (blue). **(B)** CD3 immunofluorescence labeling of TMA TNBC tissues with LSD1 status. CD3 T cells (cyan), Pancytokeratin tumors (green), SYTO 13 nuclei (blue).

**Fig. S5. Characteristics of ChIP-seq and RNA-seq samples for human breast epithelia lines. (A)** PCA clustering projection on top two principal components for biological replicates. **(B)** Bar plot on number of identified LSD1 peaks for human breast epithelia lines.

**SUPPLEMENTARY TABLES**

| **Table S1. Details of** **antibodies used for immunohistochemistry labelling of TNBC sections** | | | | | | |
| --- | --- | --- | --- | --- | --- | --- |
| **Antibody** | **Clone** | **Dilution** | **Source** | **Cellular localisation** | **Antigen retrieval** | **Positive control** |
| LSD1 | 1B2E5 | 1:25 | mAb #41-3300  (ThermoFisher Scientific) | Nucleus | H1(20 min) | Lung adenocarcinoma |

| **Table S2. Details of antibodies used for Chromatin immunoprecipitation (ChIP-seq), Digital Spatial Profiling (DSP), Immunoblot and Flow cytometry experiments** | | | |
| --- | --- | --- | --- |
| **Chromatin immunoprecipitation (ChIP-seq)** | | | |
| **Antibody** | **Dilution/Volume** | **Species Reactivity** | **Source** |
| LSD1 | 20μg | Human | pAb #A300-215A  (ThermoFisher Scientific) |
| **Digital Spatial Profiling (DSP) – Full slide sections** | | | |
| **Antibody** | **Dilution/Volume** | **Species Reactivity** | **Source** |
| CD3-AF532 | 1:100 | Human | mAb #C3e/1308  (Novus Biologicals) |
| CD8-AF594 | 1:100 | Human | mAb #ab305370  (Abcam) |
| CD20-AF647 | 1:100 | Human | mAb #IGEL/773  (Novus Biologicals) |
| **Digital Spatial Profiling (DSP) – TMA sections** | | | |
| **Antibody** | **Dilution/Volume** | **Species Reactivity** | **Source** |
| PanCK-AF488 | 1:100 | Human | mAb #AE1/AE3  (Novus Biologicals) |
| CD8-AF594 | 1:100 | Human | mAb #ab305370  (Abcam) |
| CD3-AF647 | 1:100 | Human | mAb #CD3-12  (Bio-Rad) |
| **Immunoblot** | | | |
| **Antibody** | **Dilution/Volume** | **Species Reactivity** | **Source** |
| LSD1 | 1:1000 | Human | pAb #A300-215A  (ThermoFisher Scientific) |
| GADPH | 1:1000 | Human | pAb #10494-1-AP  (Proteintech) |
| HIF1-A | 1:1000 | Human | mAb #H1alpha67  (Novus Biologicals) |
| C-MYC | 1:1000 | Human | pAb #9402  (Cell Signaling Technology) |
| VEGFA | 1:1000 | Human | pAb #ab183100  (Abcam) |
| H3K4me1 | 1:1000 | Human | pAb #ab8895  (Abcam) |
| H3K4me2 | 1:1000 | Human | mAb #ab32356  (Abcam) |
| H3K4me3 | 1:1000 | Human | pAb #07-473  (Merck Millipore) |
| H3K9me1 | 1:1000 | Human | pAb #ab8896  (Abcam) |
| H3K9me2 | 1:1000 | Human | mAb #ab1220  (Abcam) |
| H3K9me3 | 1:1000 | Human | pAb #ab8898  (Abcam) |
| Histone H3 | 1:1000 | Human | mAb #4499  (Cell Signaling Technology) |
| **Flow cytometry** | | | |
| **Antibody** | **Dilution/Volume** | **Species Reactivity** | **Source** |
| CD274-PE | 1:1000 | Human | mAb #12-5983-42  (ThermoFisher Scientific) |
| MHC I-AF488 | 1:1000 | Human | mAb #MA5-44137  (ThermoFisher Scientific) |

| **Table S3.** **Log-likelihood change of survival predictor models for LSD1 and its prognostic HIF-1 pathway DEGs in SGH** | | | | | | | | |
| --- | --- | --- | --- | --- | --- | --- | --- | --- |
|  | **DFS** | | | | **OS** | | | |
| **Term** |  | **AIC** | **Logrank**  **P value** | **Logrank test** |  | **AIC** | **Logrank**  **P value** | **Logrank test** |
| CPa | Reference | 769.065 | 1.27e-06 | 32.864 | Reference | 536.602 | 1.15e-09 | 47.592 |
| LSD1 | 0.314 | 703.949 | 7.88e-06 | 31.379 | 1.797 | 504.431 | 1.56e-09 | 49.746 |
| *VEGFA* | 3.637 | 714.725 | 2.47e-07 | 38.913 | 0.748 | 519.013 | 1.12e-09 | 50.453 |
| *HIF1A* | 1.123 | 719.753 | 2.51e-06 | 33.885 | 0.327 | 519.854 | 1.66e-09 | 49.611 |
| *HK2* | 1.024 | 660.350 | 4.38e-06 | 32.666 | 0.008 | 463.802 | 7.41e-09 | 46.433 |
| *ANGPT2* | 0.990 | 660.416 | 4.52e-06 | 32.600 | 0.272 | 463.273 | 5.78e-09 | 46.962 |
| *ARNT* | 0.201 | 721.596 | 5.83e-06 | 32.042 | 0.063 | 520.383 | 2.13e-09 | 49.082 |
| *MTOR* | 0.065 | 662.267 | 1.05e-05 | 30.749 | 0.021 | 463.776 | 7.33e-09 | 46.458 |
| CP (LSD1)b | Reference | 703.949 | 7.88e-06 | 31.379 | Reference | 504.431 | 1.56e-09 | 49.746 |
| *VEGFA* | 4.380 | 650.518 | 6.87e-07 | 39.091 | 1.078 | 487.371 | 1.01e-09 | 53.329 |
| *HK2* | 0.797 | 599.587 | 2.08e-05 | 31.451 | 0.056 | 435.736 | 1.61e-08 | 47.330 |
| *HIF1A* | 0.712 | 657.854 | 1.82e-05 | 31.755 | 0.047 | 489.433 | 2.62e-09 | 51.267 |
| aClinicopathological parameters (inclusive of diagnosis age, tumor grade, tumor size > 20mm, lymph node status). bClinicopathological parameters (inclusive of diagnosis age, tumor grade, tumor size > 20mm, lymph node status, LSD1 IHC status).  Note: CP, Clinicopathological parameters; , delta log-likelihood of the models; AIC, Akaike information criterion; OS, Overall survival; DFS, Disease-free survival | | | | | | | | |

| **Table S4.** **Log-likelihood change of survival predictor models for *LSD1* and its prognostic cell-cycle associated hub genes in METABRIC** | | | | | | | | |
| --- | --- | --- | --- | --- | --- | --- | --- | --- |
|  | **RFS** | | | | **OS** | | | |
| **Term** |  | **AIC** | **Logrank**  **P value** | **Logrank test** |  | **AIC** | **Logrank**  **P value** | **Logrank test** |
| CPa | Reference | 1255.713 | 6.57e-09 | 43.950 | Reference | 1570.314 | 1.30e-10 | 52.126 |
| *LSD1* | 0.175 | 1257.363 | 2.01e-08 | 44.300 | 0.658 | 1570.998 | 2.73e-10 | 53.442 |
| *MCM4* | 0.812 | 1256.089 | 1.11e-08 | 45.573 | 0.282 | 1571.750 | 3.89e-10 | 52.690 |
| *PLK1* | 0.607 | 1256.498 | 1.34e-08 | 45.165 | 1.107 | 1570.099 | 1.78e-10 | 54.341 |
| *MYC* | 0.498 | 1256.716 | 1.49e-08 | 44.946 | 0.023 | 1572.268 | 4.97e-10 | 52.172 |
| *CDC20* | 0.429 | 1256.854 | 1.59e-08 | 44.808 | 0.393 | 1571.527 | 3.50e-10 | 52.913 |
| *CDC25A* | 0.348 | 1257.016 | 1.71e-08 | 44.646 | 0.290 | 1571.734 | 3.86e-10 | 52.706 |
| *CDC25C* | 0.285 | 1257.143 | 1.82e-08 | 44.520 | 0.001 | 1572.312 | 5.08e-10 | 52.128 |
| *ESPL1* | 0.280 | 1257.152 | 1.82e-08 | 44.510 | 0.320 | 1571.673 | 3.76e-10 | 52.767 |
| *CCNB1* | 0.241 | 1257.231 | 1.89e-08 | 44.432 | 0.064 | 1572.186 | 4.79e-10 | 52.254 |
| *E2F2* | 0.117 | 1257.478 | 2.13e-08 | 44.184 | 0.021 | 1572.271 | 4.98e-10 | 52.169 |
| *CCNE1* | 0.104 | 1257.504 | 2.15e-08 | 44.158 | 0.175 | 1571.964 | 4.31e-10 | 52.476 |
| *CCNA2* | 0.090 | 1257.533 | 2.18e-08 | 44.129 | 0.238 | 1571.838 | 4.06e-10 | 52.602 |
| *MAD2L1* | 0.031 | 1257.651 | 2.30e-08 | 44.011 | 0.142 | 1572.030 | 4.44e-10 | 52.410 |
| *MCM7* | 0.026 | 1257.660 | 2.31e-08 | 44.002 | 0.101 | 1572.111 | 4.62e-10 | 52.329 |
| *CDK4* | 0.005 | 1257.704 | 2.36e-08 | 43.959 | 0.026 | 1572.261 | 4.96e-10 | 52.178 |
| *AURKB* | 0.002 | 1257.708 | 2.37e-08 | 43.954 | 0.013 | 1572.288 | 5.02e-10 | 52.152 |
| aClinicopathological parameters (inclusive of diagnosis age, tumor grade, tumor size > 20mm, lymph node status).  Note: CP, Clinicopathological parameters; , delta log-likelihood of the models; AIC, Akaike information criterion; OS, Overall survival; RFS, Relapse-free survival | | | | | | | | |

| **Table S5.** **Log-likelihood change of survival predictor models for *LSD1* and its prognostic cell-cycle associated hub genes in TCGA** | | | | | | | | |
| --- | --- | --- | --- | --- | --- | --- | --- | --- |
|  | **DFS** | | | | **OS** | | | |
| **Term** |  | **AIC** | **Logrank**  **P value** | **Logrank test** |  | **AIC** | **Logrank**  **P value** | **Logrank test** |
| CPa | Reference | 64.762 | 0.0186 | 9.998 | Reference | 67.5568 | 0.0009 | 16.3992 |
| *LSD1* | 1.195 | 64.372 | 0.0147 | 12.388 | 1.681 | 66.195 | 0.0006 | 19.761 |
| *CCNE1* | 1.492 | 63.778 | 0.0114 | 12.982 | 1.282 | 66.993 | 0.0008 | 18.963 |
| *E2F2* | 1.213 | 64.337 | 0.0145 | 12.423 | 0.537 | 68.484 | 0.0016 | 17.472 |
| *MYC* | 1.163 | 64.436 | 0.0151 | 12.324 | 1.124 | 67.309 | 0.0009 | 18.647 |
| *MCM7* | 0.840 | 65.082 | 0.0199 | 11.678 | 0.571 | 68.414 | 0.0015 | 17.542 |
| *PLK1* | 0.700 | 65.362 | 0.0224 | 11.398 | 1.016 | 67.526 | 0.0010 | 18.430 |
| *MAD2L1* | 0.321 | 66.119 | 0.0309 | 10.641 | 0.798 | 67.960 | 0.0012 | 17.996 |
| *AURKB* | 0.122 | 66.517 | 0.0365 | 10.243 | 0.147 | 69.263 | 0.0022 | 16.693 |
| *CDC20* | 0.103 | 66.556 | 0.0371 | 10.204 | 0.015 | 69.527 | 0.0025 | 16.429 |
| *CCNA2* | 0.096 | 66.569 | 0.0373 | 10.191 | 0.007 | 69.543 | 0.0025 | 16.413 |
| *CDK4* | 0.093 | 66.575 | 0.0374 | 10.185 | 0.026 | 69.506 | 0.0025 | 16.451 |
| *MCM4* | 0.070 | 66.621 | 0.0381 | 10.139 | 0.089 | 69.379 | 0.0023 | 16.577 |
| *CCNB1* | 0.070 | 66.621 | 0.0382 | 10.139 | 0.006 | 69.544 | 0.0025 | 16.412 |
| *ESPL1* | 0.057 | 66.648 | 0.0386 | 10.112 | 0.116 | 69.325 | 0.0023 | 16.631 |
| *CDC25A* | 0.003 | 66.757 | 0.0404 | 10.003 | 0.009 | 69.538 | 0.0025 | 16.418 |
| *CDC25C* | 0.000 | 66.762 | 0.0405 | 9.998 | 0.301 | 68.955 | 0.0019 | 17.001 |
| aClinicopathological parameters (inclusive of diagnosis age, tumor stage, lymph node status).  Note: CP, Clinicopathological parameters; , delta log-likelihood of the models; AIC, Akaike information criterion; OS, Overall survival; DFS, Disease-free survival | | | | | | | | |

| **Table S6.** **Log-likelihood change of survival predictor models for *LSD1* and its prognostic cell-cycle associated hub genes in FUSCC** | | | | |
| --- | --- | --- | --- | --- |
|  | **RFS** | | | |
| **Term** |  | **AIC** | **Logrank**  **P value** | **Logrank test** |
| CPa | Reference | 337.247 | 3.02e-05 | 26.104 |
| *LSD1* | 0.136 | 338.974 | 7.54e-05 | 26.376 |
| *CDC25C* | 0.814 | 337.620 | 4.11e-05 | 27.731 |
| *CDC20* | 0.713 | 337.820 | 4.50e-05 | 27.530 |
| *MCM7* | 0.597 | 338.053 | 4.99e-05 | 27.298 |
| *MAD2L1* | 0.515 | 338.216 | 5.37e-05 | 27.135 |
| *CCNE1* | 0.492 | 338.263 | 5.49e-05 | 27.087 |
| *PLK1* | 0.379 | 338.488 | 6.07e-05 | 26.863 |
| *E2F2* | 0.307 | 338.633 | 6.47e-05 | 26.718 |
| *AURKB* | 0.200 | 338.847 | 7.12e-05 | 26.504 |
| *CCNB1* | 0.175 | 338.897 | 7.28e-05 | 26.454 |
| *CCNA2* | 0.174 | 338.898 | 7.29e-05 | 26.452 |
| *MYC* | 0.159 | 338.929 | 7.39e-05 | 26.421 |
| *CDC25A* | 0.151 | 338.945 | 7.44e-05 | 26.406 |
| *CDK4* | 0.084 | 339.080 | 7.91E-05 | 26.271 |
| *ESPL1* | 0.049 | 339.150 | 8.16E-05 | 26.201 |
| *MCM4* | 0.035 | 339.176 | 8.25E-05 | 26.175 |
| aClinicopathological parameters (inclusive of age at surgery, tumor grade, tumor size > 20mm, lymph node status).  Note: CP, Clinicopathological parameters; , delta log-likelihood of the models; AIC, Akaike information criterion; RFS, Recurrence-free survival | | | | |

| **Table S7. Summary table on expression trend and survival outcomes for prognostic cell-cycle associated hub genes ( value > 1)** | | | | | |
| --- | --- | --- | --- | --- | --- |
|  | **TNBC public cohorts** | | | | |
| **Prognostic cell cycle associated hub genes** | **FUSCC**  **RFS** | **METABRIC**  **RFS** | **METABRIC**  **OS** | **TCGA**  **DFS** | **TCGA**  **OS** |
| *PLK1* | High  (*P* = 0.056) | High  (*P* = 0.052) | High  (*P* = 0.085) | High  (*P* = 0.065) | High  (*P* = 0.1) |
| *CCNE1* | High  (*P* = 0.28) | High  (*P* = 0.53) | High  (*P* = 0.26) | High  (*P* = 0.15) | High  (*P* = 0.56) |
| *E2F2* | High  (*P* = 0.13) | High  (*P* = 0.058) | High  (*P* = 0.29) | High  (*P* = 0.025) | High  (*P* = 0.33) |
| *MYC* | High  (*P* = 0.081) | Low  (*P* = 0.087) | Low  (*P* = 0.14) | High  (*P* = 0.015) | High  (*P* = 0.036) |
